# Supplementary material
Source: PubMed Central journal article supplement (PMC3791262)
Supplement: mmc1.pdf [file mmc1.pdf]

The American Journal of Human Genetics, Volume 93

## **Supplemental Data**

### **The FSHD2 Gene *SMCHD1* Is a Modifier**

### **of Disease Severity in Families Affected by FSHD1**

Sabrina Sacconi, Richard J.L.F. Lemmers, Judit Balog, Patrick J. van der Vliet, Pauline Lahaut, Merlijn P. van Nieuwenhuizen, Kirsten R. Straasheijm, Rashmie D. Debipersad, Marianne Vos-Versteeg, Leonardo Salviati, Alberto Casarin, Elena Pegoraro, Rabi Tawil, Egbert Bakker, Stephen J. Tapscott, Claude Desnuelle, and Silvère M. van der Maarel

Table S1: Genetic and epigenetic data of the three families.

| Rf     | Nr    | LOVD-ID | SMCHD1 genomic (GRCh37, NC_000018:9) | SMCHD1 cDNA (NM_015295:2) | SMCHD1 protein (NP_056110:2) | Position | Type        | Fsel % | Allele 4q-1  | Allele 4q-2  | Allele 10q-1  | Allele 10q-2  |
|--------|-------|---------|--------------------------------------|---------------------------|------------------------------|----------|-------------|--------|--------------|--------------|---------------|---------------|
| Rf1021 | I-1   |         | None                                 | -                         | -                            | -        | -           | 37     | 9U<br>4A161  | 27U<br>4B168 | 9U<br>10A166  | 27U<br>10A166 |
|        | I-2   | #30789  | g.2700849C>T                         | c.1580C>T                 | p.Thr527Met                  | Exon 12  | Missense    | 24     | 39U<br>4Q163 | 54U<br>4A161 | 11U<br>10A166 | 21U<br>10A166 |
|        | II-1  | #30790  | g.2700849C>T                         | c.1580C>T                 | p.Thr527Met                  | Exon 12  | Missense    | 17     | 9U<br>4A161  | 54U<br>4A161 | 11U<br>10A166 | 27U<br>10A166 |
|        | II-2  |         | None                                 | -                         | -                            | -        | -           | 26     | 11U<br>4A161 | 18U<br>4A161 | 53U<br>10A166 | 54U<br>10A166 |
|        | III-1 |         | None                                 | -                         | -                            | -        | -           | 45     | 11U<br>4A161 | 54U<br>4A161 | 11U<br>10A166 | 54U<br>10A166 |
| Rf1110 | III-2 | #30791  | g.2700849C>T                         | c.1580C>T                 | p.Thr527Met                  | Exon 12  | Missense    | 10     | 9U<br>4A161  | 18U<br>4A161 | 11U<br>10A166 | 53U<br>10A166 |
|        | I-1   | #30792  | g.2729409T>C                         | c.3048+2T>C               |                              | Intron24 | Splice site | 8      | 9U<br>4A161  | 63U<br>4A161 | 15U<br>10A166 | 19U<br>10A166 |
|        | I-2   |         | None                                 | -                         | -                            | -        | -           | 57     | 16U<br>4B163 | 22U<br>4B168 | 30U<br>10A166 | 43U<br>10A166 |
|        | II-1  | #30793  | g.2729409T>C                         | c.3048+2T>C               |                              | Intron24 | Splice site | 10     | 22U<br>4B168 | 63U<br>4A161 | 19U<br>10A166 | 30U<br>10A166 |
|        | II-2  |         | None                                 | -                         | -                            | -        | -           | 28     | 9U<br>4A161  | 16U<br>4B163 | 15U<br>10A166 | 30U<br>10A166 |
| Rf1121 | II-1  | #30794  | g.2769710delA                        | c.4738delA                | p.Ser1580fs                  | Exon 38  | Deletion    | 9      | 9U<br>4A161  | 59U<br>4A166 | 34U<br>10A164 | 34U<br>10A166 |

Detailed analysis of D4Z4 genotype on chromosomes 4 and 10 (columns Allele 4q-1, Allele 4q-2, Allele 10q-1 and Allele 10q-2), D4Z4 methylation (column *FseI*%) and *SMCHD1* mutations for all individuals of families Rf1021, Rf1110 and Rf1121. Variant and phenotype data were submitted to the *SMCHD1* gene variant database ([www.LOVD.nl/SMCHD1/](http://www.LOVD.nl/SMCHD1/)) with patient accession numbers 30789 to 30794 (column LOVD-ID). The position of the mutation in the *SMCHD1* gene is given with respect to chromosome (GRCh37, NC\_000018.9), transcript (NM\_015295) and protein (NP\_056110.2). The position of the *SMCHD1* mutations and the type are also indicated.

The comprehensive genotype of the D4Z4 region on chromosomes 4 and 10 was based on analysis of the size of the repeat arrays by pulsed field gel electrophoresis analysis, single sequence length polymorphism (SSLP) analysis at the proximal end of the repeat arrays and determination of the distal variation A or B, as previously described<sup>1</sup> (see also the Fields Center for FSHD Research Website <http://www.urmc.rochester.edu/fields-center/> for detailed protocols). The repeat lengths of the FSHD1-sized D4Z4 repeat arrays was confirmed using Southern blot analysis of genomic DNA digested with *EcoRI* and double digested with *EcoRI* and *BlnI* separated by conventional linear gel electrophoresis, using a 5 kb ladder as DNA size standard (Biorad, 170-3624). Methylation levels in the proximal D4Z4 repeat units of chromosomes 4q and 10q was performed as reported.<sup>2</sup>

Mutation analysis of the *SMCHD1* gene at DNA or RNA level was performed as described in our previous study.<sup>3</sup> Primer sequences are available on request.

Table S2: Genetic data FSHD1 myoblasts in SMCHD1 depletion experiment.

| sample  | M/F | Allele 4_1 |           | Allele 4_2 |           | Allele 10_1 |           | Allele 10_2 |           |
|---------|-----|------------|-----------|------------|-----------|-------------|-----------|-------------|-----------|
|         |     | units      | haplotype | units      | haplotype | units       | haplotype | units       | haplotype |
| FSHD1 a | M   | 6          | 4A161     | 11         | 4A168     | 16          | 10A166    | 23          | 10A176T   |
| FSHD1 b | F   | 6          | 4A161     | 52         | 4B168     | 18          | 10A166    | 21          | 10A166    |
| FSHD1 c | F   | 4          | 4A161     | 13         | 4B163     | 9           | 10A166    | 19          | 10A166    |

Detailed analysis of D4Z4 genotype (number of units and haplotype) on chromosomes 4 and 10 (columns Allele 4\_1, Allele 4\_2, Allele 10\_1 and Allele 10\_2) for three different myoblasts that have been used in the SMCHD1 depletion experiment. Gender of the myoblast is indicated in column M/F.

These unrelated FSHD1 myoblasts were obtained from the Fields Center and grown as previously described.<sup>3</sup> Genetic analysis identified an FSHD-permissive *DUX4*-PAS containing 4qA chromosome with a repeat size of 6 units (FSHD1a and FSHD1b), or 4 units (FSHD1c). Two individuals (FSHD1b and FSHD1c) carry a 4qB haplotype on the non-affected chromosome 4 and therefore *DUX4* expression is only possible from their FSHD1 allele.

### Supplemental References

1. Lemmers, R.J., van der Vliet, P.J., van der Gaag, K.J., Zuninga, S., Frants, R.R., de Knijff, P., and van der Maarel, S.M. (2010). Worldwide population analysis of the 4q and 10q subtelomeres identifies only four discrete duplication events in human evolution. *Am. J. Hum. Genet.* 86, 364-377.
2. de Greef, J.C., Lemmers, R.J., Camano, P., Day, J.W., Sacconi, S., Dunand, M., van Engelen, B.G., Kiuru-Enari, S., Padberg, G.W., Rosa, A.L., et al. (2010). Clinical features of facioscapulohumeral muscular dystrophy 2. *Neurology* 75, 1548-1554.
3. Lemmers, R.J., Tawil, R., Petek, L.M., Balog, J., Block, G.J., Santen, G.W., Amell, A.M., van der Vliet, P.J., Almomani, R., Straasheijm, K.R., et al. (2012). Digenic inheritance of an SMCHD1 mutation and an FSHD-permissive D4Z4 allele causes facioscapulohumeral muscular dystrophy type 2. *Nat. Genet.* 44, 1370-1374.
